# Supplementary material for: The Relationship Between Exercise and The Occurrence of Abdominal Wall Complications in Patients on Peritoneal Dialysis
Source: Research Square preprint supplement (doi:10.21203/rs.3.rs-6077789/v1), 2025-04-14
Supplement: Supplementary file 1 [file 188e73619a1248793d4b45f6.docx]

**Supplement table 1:** **Univariate analyses by competing-risk regression for risk factors of abdominal wall complications in patients followed for more than 3 months**

| Variables | Univariate analysis | | Variables | Univariate analysis | |
| --- | --- | --- | --- | --- | --- |
| HR (95% CI) | *P* | HR (95% CI) | *P* |
| Gender | 0.83 (0.42-1.63) | 0.581 | eIPP | 1.02 (0.90-1.14) | 0.791 |
| Age | 1.00 (0.98-1.02) | 0.807 | Total cholesterol, mmol/L | 0.72 (0.52-0.99) | 0.042 |
| Abdominal surgery history | 0.50 (0.18-1.41) | 0.188 | Serum iron | 1.03 (1.02-1.03) | <0.001 |
| Diabetes | 1.41(0.70-2.83) | 0.340 | Residual kidney Kt/V | 1.62 (1.00-2.63) | 0.051 |

HR, hazard ratio; CI, confidence interval. Hazard ratios (HRs) and 95% CIs were estimated using univariate competing-risk regression analyzes. Abbreviations: eIPP, estimated intraperitoneal pressure
